# Supplementary material for: Madecassoside Inhibits Melanin Synthesis by Blocking Ultraviolet-Induced Inflammation
Source: PubMed Central journal article supplement (PMC6290557; doi:10.3390/molecules181215724), 2013-12-16

# Supplement Information

**Figure S1.** Effects of MA on melanin synthesis in single melanocyte model.

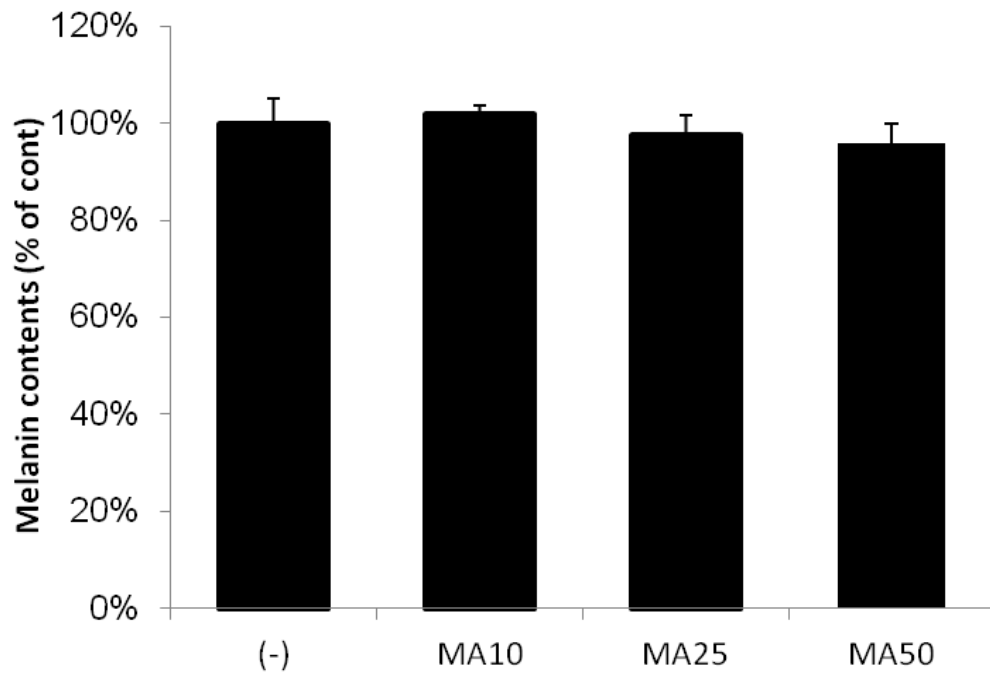

**Figure S2.** Full-length images of immunoblots.

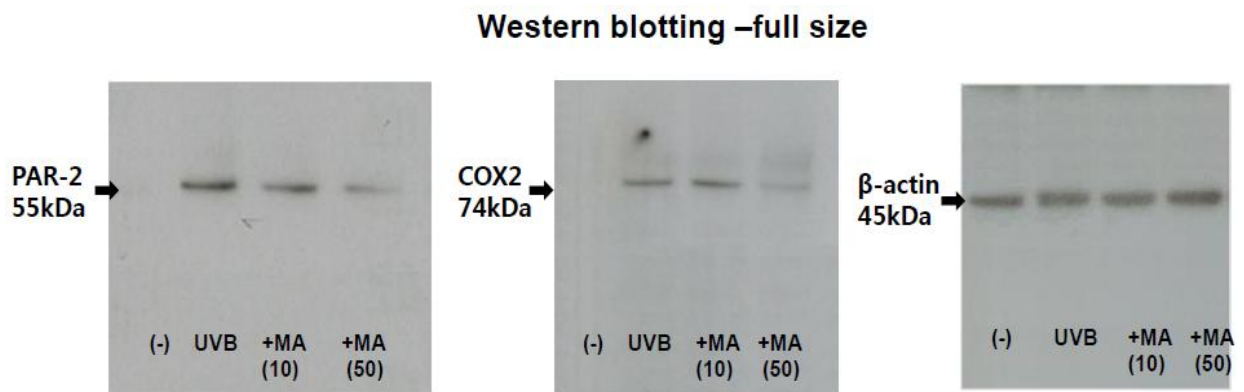

Supplement: molecules-18-15724-s002.pdf [file molecules-18-15724-s002.pdf]
